# Supplementary material for: Tartaric acid stabilized iridium nanoparticles with excellent laccase-like activity
Source: Royal Society of Chemistry journal article supplement (doi:10.1039/d2tb02798d), 2023-01-01
Supplement: d2tb02798d1.pdf [file d2tb02798d1.pdf]

## Supplement information

### Tartaric acid stabilized iridium nanoparticles with excellent laccase-like activity

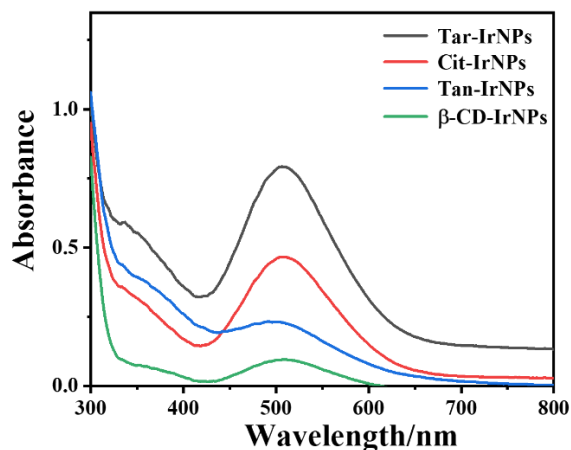

**Fig. S1** Comparison of the laccase-like activity of iridium nanoparticles. Reaction conditions: 260  $\mu\text{M}$  2,4-DP, 210  $\mu\text{M}$  4-AP, 43  $\mu\text{g/ml}$  IrNPs, 2 mL 0.1 M acetate buffer solution (pH=7.0).

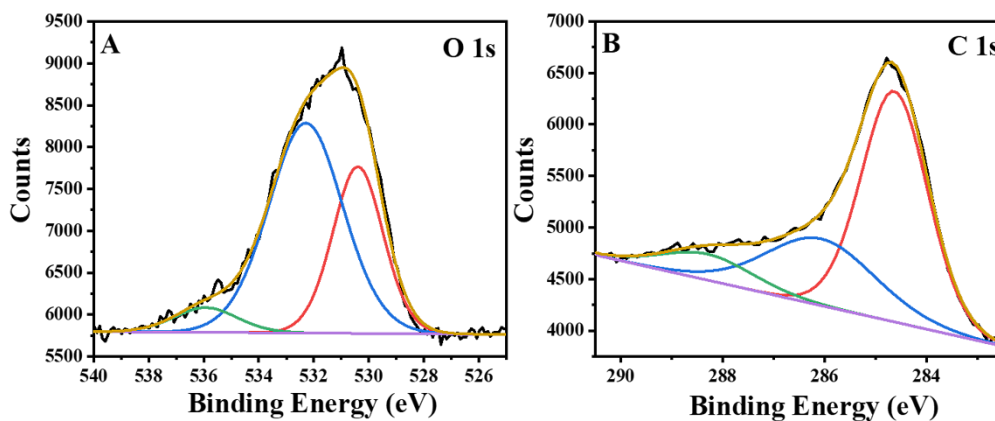

**Fig. S2** (A) XPS spectrum in the O 1s region of Tar-IrNPs. (B) XPS spectrum in the C 1s region of Tar-IrNPs.

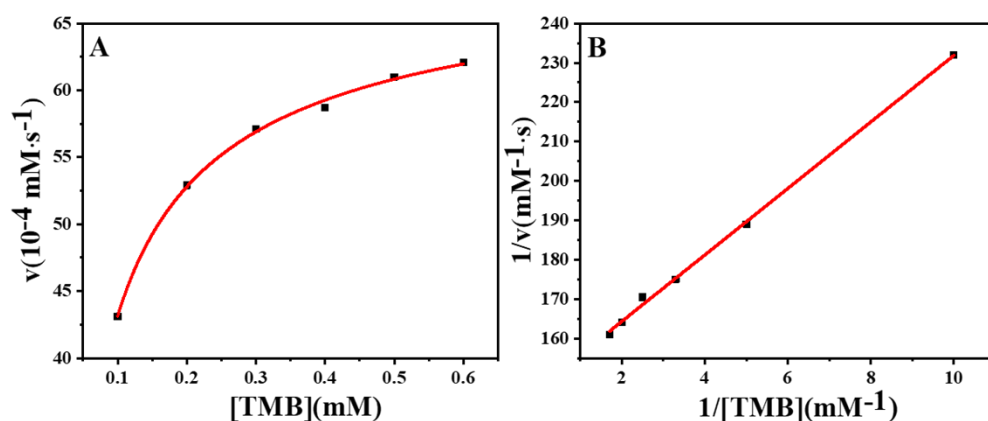

**Fig. S3** (A) Steady state kinetic assay of oxidase-like activity of Tar-IrNPs at room temperature. (B) Double-reciprocal plots of oxidase-like activity of Tar-IrNPs. Reaction conditions: 0.1 M acetate buffer solution (pH 4.0) in the presence of  $10 \mu\text{g/mL}$  Tar-IrNPs. The kinetic constants were determined in the presence of different concentrations of TMB (0.1-0.6 mM).

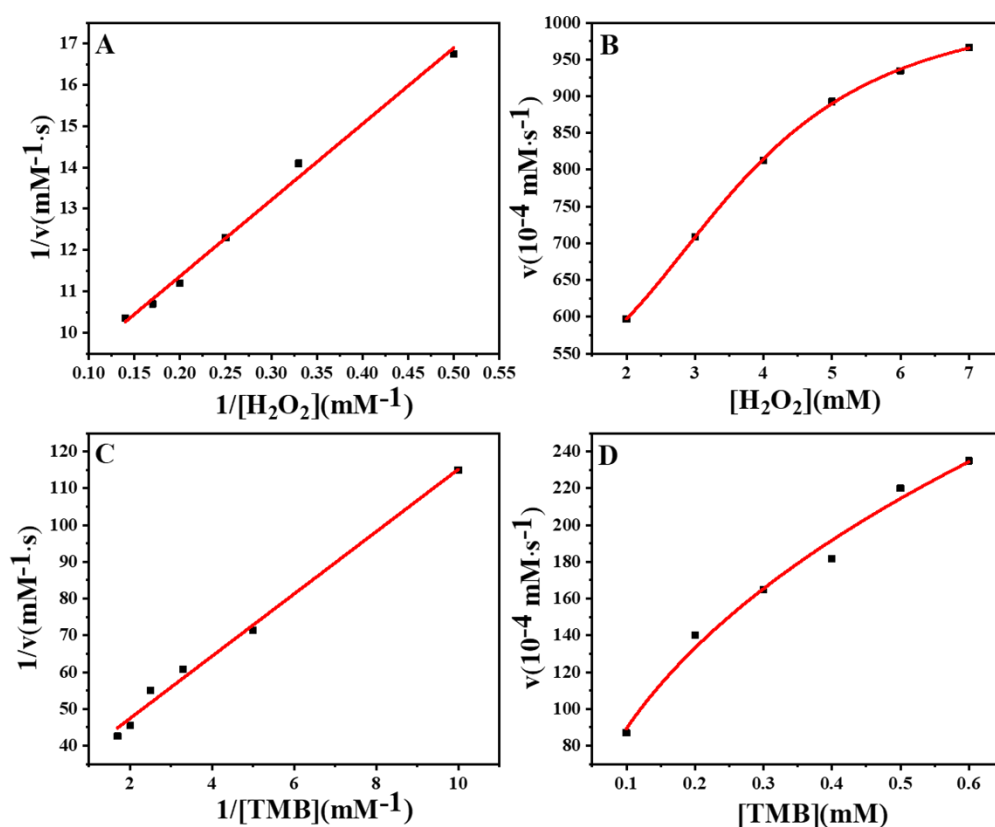

**Fig. S4** Steady-state kinetic assay of peroxidase-like activity of the TA-IrNPs. The Lineweaver-Burk curves obtained from (A)  $H_2O_2$  and (C) TMB. The dependence of the catalytic reaction rates on the concentration of the substrate (B)  $H_2O_2$  and (D) TMB.

**Table S1.****Kinetic parameters of peroxidase-like activities of Tar-IrNPs and other reported nanozymes.**

| enzyme    | [E] (M)               | substrate                     | K <sub>m</sub> (mM) | V <sub>m</sub> (10 <sup>-3</sup> mM·s <sup>-1</sup> ) | K <sub>cat</sub> (10 <sup>-3</sup> s <sup>-1</sup> ) | ref       |
|-----------|-----------------------|-------------------------------|---------------------|-------------------------------------------------------|------------------------------------------------------|-----------|
| Cit-IrNPs | 3.4×10 <sup>-7</sup>  | TMB                           | 0.0906              | 1.7                                                   | 0.5                                                  | [1]       |
|           |                       | H <sub>2</sub> O <sub>2</sub> | 0.27                | 1.5                                                   | 0.44                                                 |           |
| HRP       | 2.5×10 <sup>-11</sup> | TMB                           | 0.434               | 0.1                                                   | 0.4                                                  | [2]       |
|           |                       | H <sub>2</sub> O <sub>2</sub> | 3.7                 | 0.871                                                 | 0.348                                                |           |
| PVP-IrNPs | 1.97×10 <sup>-9</sup> | TMB                           | 0.02                | 0.108                                                 | 0.055                                                | [3]       |
|           |                       | H <sub>2</sub> O <sub>2</sub> | 266                 | 0.385                                                 | 0.196                                                |           |
| Tar-IrNPs | 3.17×10 <sup>-7</sup> | TMB                           | 0.278               | 2.2                                                   | 0.69                                                 | This work |
|           |                       | H <sub>2</sub> O <sub>2</sub> | 0.43                | 1.8                                                   | 0.56                                                 |           |

**Table S2.****Kinetic parameters of laccase-like activities of Tar-IrNPs and Natural laccase.**

| Catalyst        | K <sub>m</sub> (mM) | V <sub>m</sub> (10 <sup>-3</sup> mM·s <sup>-1</sup> ) |
|-----------------|---------------------|-------------------------------------------------------|
| Natural Laccase | 0.41                | 0.122                                                 |
| Tar-IrNPs       | 0.204               | 5.4                                                   |

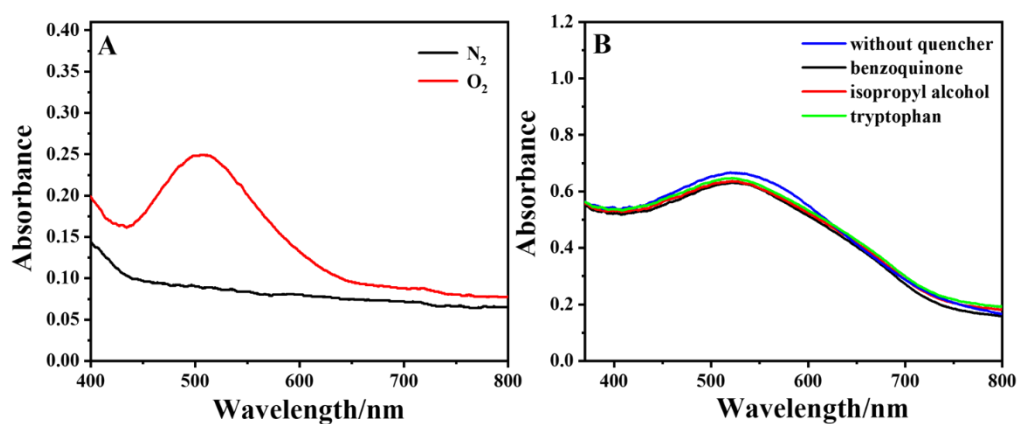

**Fig. S5.** (A) The effect of different atmospheric conditions on the activity of Tar-IrNPs. (B) The UV-vis absorption spectra of the oxidized product of PPD in the presence of Tar-IrNPs and different ROS scavengers.

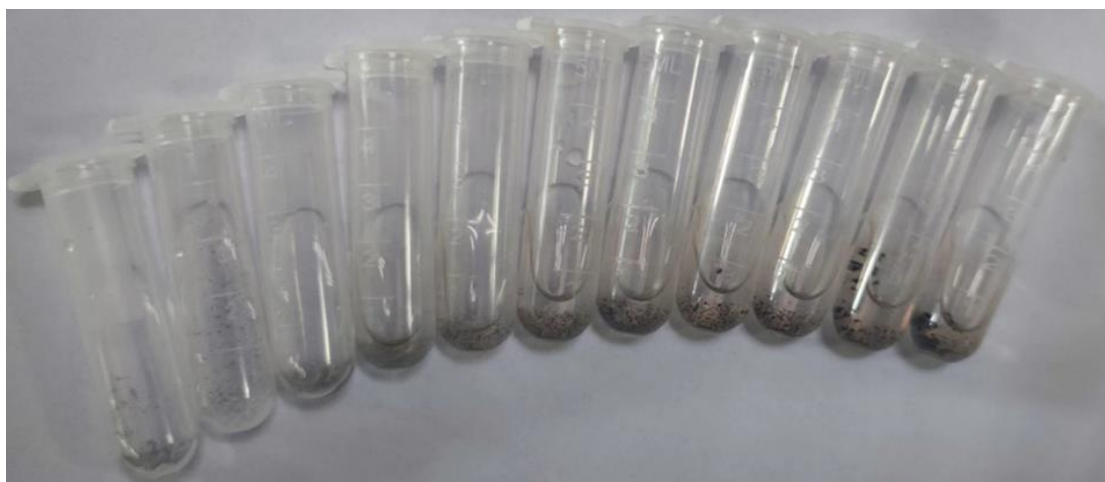

**Fig. S6.** Adding Tar-IrNPs to the PPD solution after a period of reaction (The PPD concentration increases from left to right).

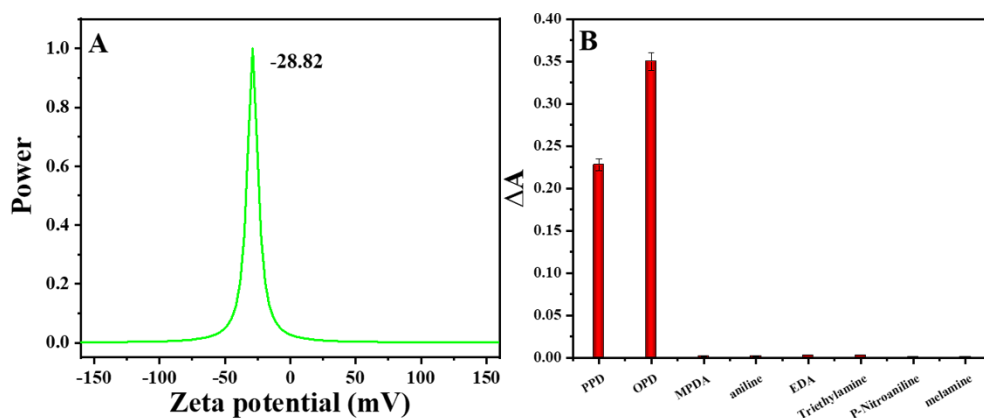

**Fig. S7.** (A) The zeta potential of Tar-IrNPs. (B) Effect of other molecules on the chromogenic reaction.

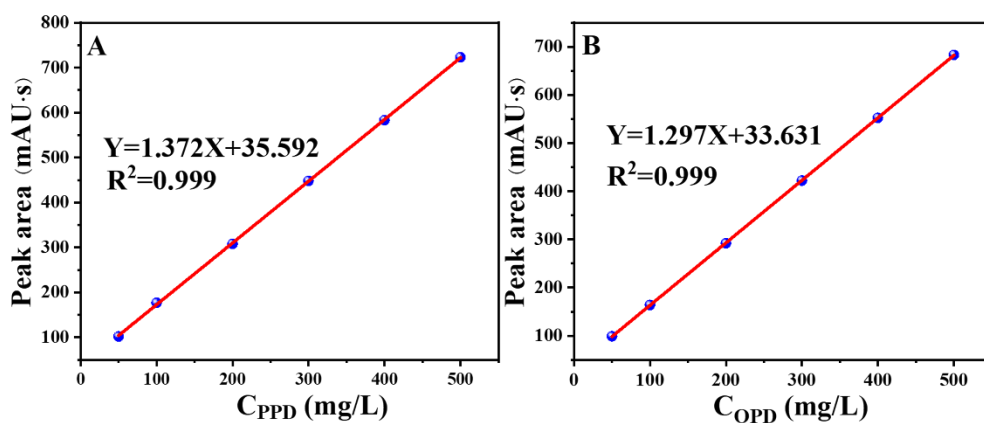

**Fig. S8.** The calibration curve for PPD and OPD analysis by HPLC method.

## References

- [1] G. Jin, J. Liu, C. Wang, W. Gu, G. Ran, B. Liu, Q. Song, Ir nanoparticles with multi-enzyme activities and its application in the selective oxidation of aromatic alcohols, *Applied Catalysis B: Environmental*, 267 (2020).
- [2] J.L. Dong, L.N. Song, J.J. Yin, W.W. He, Y.H. Wu, N. Gu, Y. Zhang, Co<sub>3</sub>O<sub>4</sub> Nanoparticles with Multi-Enzyme Activities and Their Application in Immunohistochemical Assay, *Acs Applied Materials & Interfaces*, 6 (2014) 1959-1970.
- [3] H. Su, D.D. Liu, M. Zhao, W.L. Hu, S.S. Xue, Q. Cao, X.Y. Le, L.N. Ji, Z.W. Mao, Dual-Enzyme Characteristics of Polyvinylpyrrolidone-Capped Iridium Nanoparticles and Their Cellular Protective Effect against H<sub>2</sub>O<sub>2</sub>-Induced Oxidative Damage, *ACS Appl Mater Interfaces*, 7 (2015) 8233-8242.
